# Supplementary material
Source: publisher site journal article supplement (https://www.spandidos-publications.com/1675/downloadSupplementary)
Supplement: Supplementary file 1 [file downloadSupplementary]

Figure S1. Kaplan-Meier survival curves for the PFS of patients with EGFR mutation vs. patients without EGFR mutation (median PFS time, 12.2 vs. 11.6 months; 95% CI, 9.7-14.7 vs. 7.7-15.5, respectively;  $P=0.369$ ). HR, hazard ratio; PFS, progression-free survival; EGFR, epidermal growth factor receptor; CI, confidence interval.

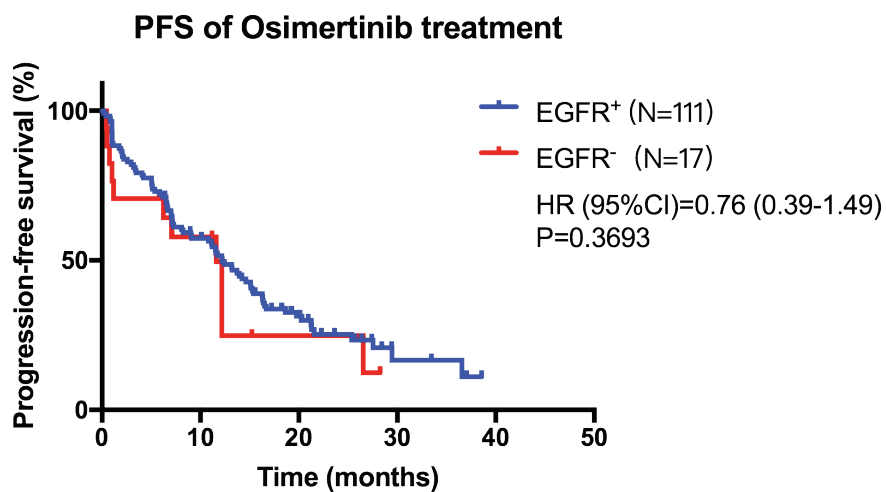

Figure S2. Kaplan-Meier survival curves for the median PFS of all the patients was 12.17 months (95% CI, 10.6-13.8) and the median OS was 29.33 months (95% CI, 27.1-31.6). PFS, progression-free survival; OS, overall survival; confidence interval.

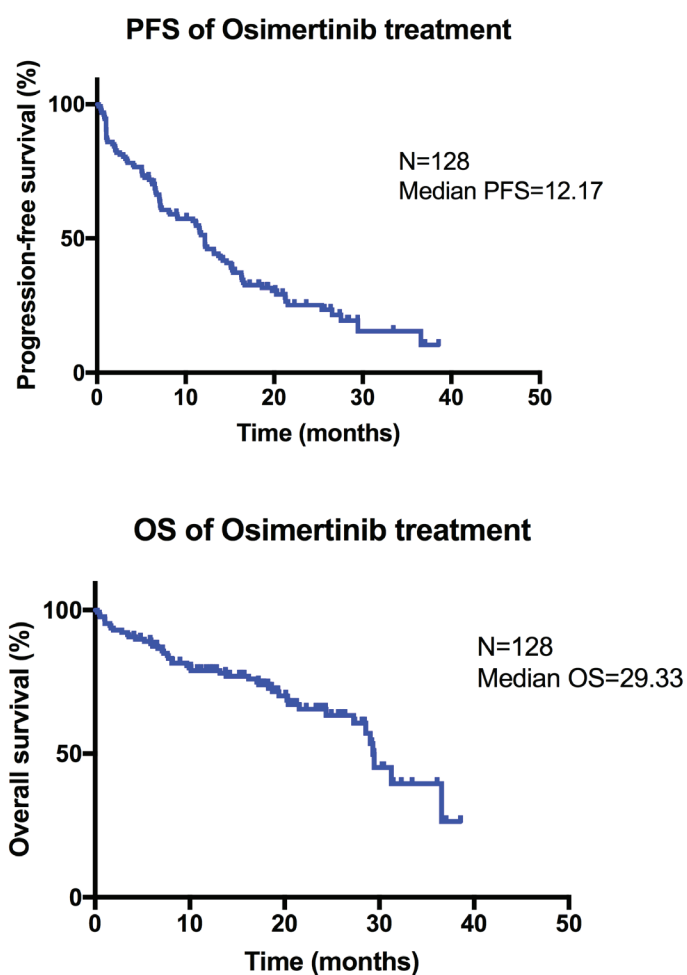

Figure S3. Kaplan-Meier survival curves for the PFS of 14 patients with acquired complex mutations vs. 87 patients with single EGFR mutations (median PFS time, 11.2 vs. 14.6 months; 95% CI, 8.5-13.9 vs. 10.6-18.6, respectively;  $P=0.0206$ ). HR, hazard ratio; PFS, progression-free survival; EGFR, epidermal growth factor receptor; CI, confidence interval.

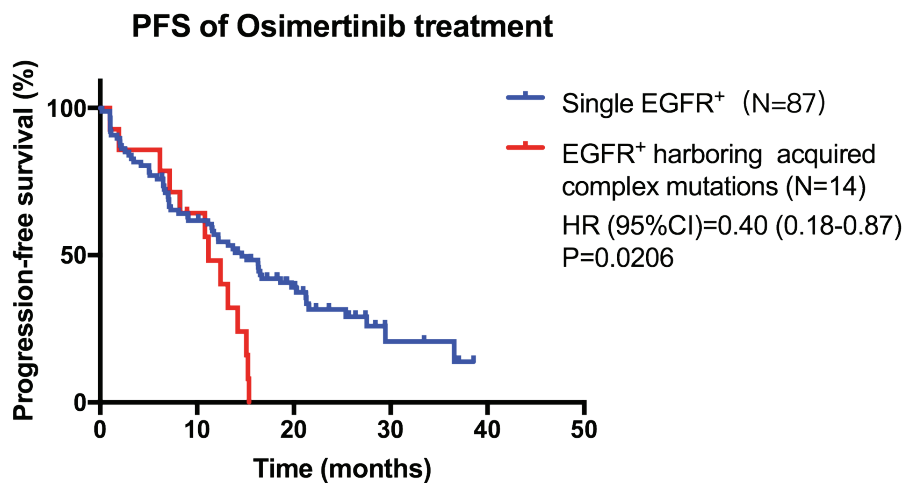

Table SI. Characteristics of T790M<sup>+</sup> patients with or without complex mutations.

| Characteristic                                          | T790M <sup>+</sup><br>(n=41) | T790M <sup>+</sup> and<br>complex mutations (n=13) | P-value |
|---------------------------------------------------------|------------------------------|----------------------------------------------------|---------|
| Age (range), years                                      | 61.5 (34-83)                 | 52 (30-72)                                         | 0.779   |
| Sex, n (%)                                              |                              |                                                    | 0.322   |
| Female                                                  | 27 (50.0)                    | 7 (13.0)                                           |         |
| Male                                                    | 14 (25.9)                    | 6 (11.1)                                           |         |
| Smoking history, n (%)                                  |                              |                                                    | 0.126   |
| Yes                                                     | 10 (18.5)                    | 6 (11.1)                                           |         |
| No                                                      | 31 (57.4)                    | 7 (13.0)                                           |         |
| ECOG performance status at osimertinib treatment, n (%) |                              |                                                    | 0.417   |
| 0-1                                                     | 36 (87.8)                    | 13 (100.0)                                         |         |
| 2                                                       | 3 (7.3)                      | 0 (0)                                              |         |
| 3                                                       | 2 (4.9)                      | 0 (0)                                              |         |
| Objective response rate, n (%)                          | 32 (78.0)                    | 7 (53.8)                                           | 0.180   |
| Disease control rate, n (%)                             | 38 (92.7)                    | 10 (76.9)                                          | 0.143   |

Differences between groups were analyzed with a Student's t-test for age and with a  $\chi^2$  test/Fisher's exact test for all other variables. ECOG, Eastern Cooperative Oncology Group.

Table SII. Characteristics of patients with or without additional complex- mutations.

| Characteristic                                          | EGFR <sup>+</sup><br>(n=87) | EGFR <sup>+</sup> and<br>complex-mutations (n=24) | P-value |
|---------------------------------------------------------|-----------------------------|---------------------------------------------------|---------|
| Median age (range), years                               | 57 (34-83)                  | 51.5 (28-72)                                      | 0.094   |
| Sex, n (%)                                              |                             |                                                   | 0.949   |
| Female                                                  | 55 (63.2)                   | 15 (62.5)                                         |         |
| Male                                                    | 32 (36.8)                   | 9 (37.5)                                          |         |
| Smoking history, n (%)                                  |                             |                                                   | 0.154   |
| Yes                                                     | 20 (23.0)                   | 9 (37.5)                                          |         |
| No                                                      | 67 (77.0)                   | 15 (62.5)                                         |         |
| ECOG performance status at osimertinib treatment, n (%) |                             |                                                   | 0.128   |
| 0-1                                                     | 67 (77.0)                   | 20 (83.3)                                         |         |
| 2                                                       | 15 (17.3)                   | 1 (4.2)                                           |         |
| 3                                                       | 5 (5.7)                     | 3 (12.5)                                          |         |
| Treatment line, n (%)                                   |                             |                                                   | 0.074   |
| First line                                              | 4 (4.6)                     | 0 (0)                                             |         |
| Second line                                             | 52 (59.8)                   | 21 (87.5)                                         |         |
| Third line and after                                    | 31 (35.6)                   | 3 (12.5)                                          |         |
| Objective response rate, n (%)                          | 61 (71.1)                   | 9 (37.5)                                          | 0.014   |
| Disease control rate, n (%)                             | 75 (86.2)                   | 17 (70.8)                                         | 0.076   |

Differences between groups were analyzed with a Student's t-test for age and with a  $\chi^2$  test/Fisher's exact test for all other variables. EGFR, epidermal growth factor receptor; ECOG, Eastern Cooperative Oncology Group.
